# Supplementary material for: Food production and agricultural systems on the southwestern frontier of the Han Empire: archaeobotanical remains from the 2016 excavation of Hebosuo, Yunnan
Source: Springer Nature journal article supplement (doi:10.1007/s12520-023-01766-9), 2023-05-01
Supplement: MOESM2 [file 12520_2023_1766_MOESM2_ESM.pdf]

## Supplementary material S2.

### Individual grain measurements on main species from the 2016 Hebosuo samples.

Wheat- *Triticum aestivum*

| Grain n. | Time Period | Type | Lenght in mm | Width in mm | L:W      |
|----------|-------------|------|--------------|-------------|----------|
| 1        | Dian        | 2    | 3.347        | 2.636       | 1.269727 |
| 2        | Dian        | 2    | 3.461        | 3.066       | 1.128832 |
| 3        | Dian        | 2    | 3.264        | 2.456       | 1.32899  |
| 4        | Dian        | 2    | 3.483        | 2.756       | 1.263788 |
| 5        | Dian        | 2    | 2.861        | 2.177       | 1.314194 |
| 6        | Han         | 2    | 3.741        | 3.347       | 1.117717 |
| 7        | Han         | 2    | 3.366        | 2.833       | 1.18814  |
| 8        | Han         | 2    | 3.197        | 2.347       | 1.362164 |
| 9        | Han         | 2    | 3.22         | 2.416       | 1.332781 |
| 10       | Han         | 2    | 2.489        | 1.957       | 1.271845 |
| 11       | Han         | 2    | 3.453        | 2.616       | 1.319954 |
| 12       | Han         | 2    | 3.644        | 2.915       | 1.250086 |
| 13       | Han         | 2    | 2.832        | 2.239       | 1.26485  |
| 15       | Han         | 2    | 3.676        | 2.832       | 1.298023 |
| 16       | Han         | 2    | 3.57         | 2.618       | 1.363636 |
| 17       | Han         | 2    | 2.923        | 2.455       | 1.190631 |
| 18       | Han         | 2    | 4.159        | 3.023       | 1.375786 |
| 35       | Han         | 2    | 3.353        | 2.593       | 1.293097 |
| 20       | Han         | 2    | 3.345        | 2.539       | 1.317448 |
| 21       | Han         | 2    | 3.169        | 2.678       | 1.183346 |
| 22       | Han         | 2    | 3.12         | 2.711       | 1.150867 |
| 23       | Han         | 2    | 3.284        | 2.827       | 1.161655 |
| 24       | Han         | 2    | 4.027        | 3.83        | 1.051436 |
| 25       | Han         | 2    | 4.164        | 3.005       | 1.385691 |
| 26       | Han         | 1    | 4.005        | 2.425       | 1.651546 |
| 27       | Han         | 1    | 3.949        | 2.342       | 1.686166 |
| 28       | Han         | 1    | 4.126        | 2.567       | 1.607324 |
| 29       | Han         | 1    | 3.513        | 2.159       | 1.627142 |
| 30       | Han         | 1    | 4.03         | 2.484       | 1.622383 |
| 31       | Han         | 1    | 4.08         | 2.207       | 1.848663 |
| 32       | Han         | 1    | 3.741        | 2.318       | 1.613891 |
| 33       | Han         | 1    | 3.822        | 2.377       | 1.607909 |
| 34       | Han         | 1    | 3.376        | 2.201       | 1.533848 |
| 36       | Han         | 1    | 3.46         | 1.97        | 1.756345 |
| 37       | Han         | 1    | 3.535        | 2.416       | 1.463162 |
| 38       | Han         | 1    | 2.779        | 1.565       | 1.775719 |
| 39       | Han         | 1    | 3.872        | 2.451       | 1.579763 |
| 14       | Han         | 1    | 3.299        | 1.938       | 1.70227  |
| 19       | Han         | 1    | 3.224        | 2.213       | 1.456846 |

Rice- *Oryza sativa*

| Grain n. | Time period | Context        | Length in mm | Width in mm | Thickness in mm | L:W         |
|----------|-------------|----------------|--------------|-------------|-----------------|-------------|
| 1        | Dian        | T2(17)b-2-3    | 3.853        | 2.148       | 1.728           | 1.793761639 |
| 2        | Dian        | T2(17)b-2-2    | 3.627        | 2.437       | 1.921           | 1.488305293 |
| 3        | Dian        | T2(17)b-2-1    | 4.368        | 2.454       | 2.079           | 1.7799511   |
| 4        | Dian        | T1(17)c-1      | 4.102        | 2.42        | 2.094           | 1.695041322 |
| 5        | Dian        | T1(17)b-1-2    | 4.24         | 2.323       | 1.91            | 1.825226001 |
| 6        | Dian        | T1(17)b-1-1    | 4.436        | 1.929       | 1.684           | 2.299637118 |
| 7        | Dian        | T1(17)b-1      | 4.053        | 1.334       | 1.087           | 3.038230885 |
| 8        | Dian        | T1(17)a-1-3    | 3.992        | 2.131       | 1.678           | 1.873298921 |
| 9        | Dian        | T1(17)a-1-2    | 4.232        | 2.327       | 1.707           | 1.818650623 |
| 10       | Dian        | T1(17)a-1-1    | 5.214        | 3.398       | 2.51            | 1.534432019 |
| 11       | Han         | T2(14)-1       | 4.513        | 2.338       | 2.048           | 1.930282293 |
| 12       | Han         | T1T2(9): 8-1-3 | 3.912        | 2.799       | 1.995           | 1.397642015 |
| 13       | Han         | T1T2(9): 8-1-2 | 4.829        | 2.699       | 2.11            | 1.789181178 |
| 14       | Han         | T1T2(9): 8-1-1 | 4.615        | 2.458       | 1.871           | 1.877542718 |
| 15       | Han         | T1(16)-8       | 5.665        | 2.671       | 2.266           | 2.120928491 |
| 16       | Han         | T1(16)-3       | 4.47         | 1.942       | 2.018           | 2.301750772 |
| 17       | Han         | T1(14)-3       | 4.181        | 2.108       | 1.447           | 1.983396584 |
| 18       | Han         | T1(14)-2       | 4.324        | 1.778       | 1.341           | 2.431946007 |
| 19       | Han         | T1(13)-4-3     | 4.188        | 2.756       | 2.209           | 1.519593614 |
| 20       | Han         | T1(13)-4-2     | 6.264        | 3.109       | 2.268           | 2.014795754 |
| 21       | Han         | T1(13)-4-1     | 4.478        | 2.21        | 2.067           | 2.026244344 |
| 22       | Han         | T1(11)-2       | 5.127        | 2.968       | 2.084           | 1.727425876 |
| 23       | Han         | H2-2-3         | 4.781        | 2.553       | 2.053           | 1.872698786 |
| 24       | Han         | H2-2-2         | 4.158        | 2.48        | 1.788           | 1.676612903 |
| 25       | Han         | H2-2-1         | 5.401        | 2.106       | 2.187           | 2.564577398 |

Foxtail millet- *Setaria italica*

| Grain no. | Time Period | Context     | Length in mm | Width in mm | Thickness in mm | L:W      |
|-----------|-------------|-------------|--------------|-------------|-----------------|----------|
| 1         | Dian        | T1(17)c-1-1 | 1.027        | 1.157       | 0.848           | 0.88764  |
| 2         | Dian        | T1(17)c-1-2 | 0.954        | 1.022       | 0.734           | 0.933464 |
| 3         | Dian        | T1(17)c-1-3 | 1.056        | 0.898       | 0.664           | 1.175947 |
| 4         | Dian        | T1(17)c-1-4 | 0.994        | 0.825       | 0.833           | 1.204848 |
| 5         | Han         | T1(15)-3    | 1.423        | 0.997       | 0.709           | 1.427282 |
| 6         | Han         | T1(13)-4    | 1.478        | 1.516       | 1.254           | 0.974934 |
| 7         | Han         | H2-1-1      | 1.356        | 1.143       | 0.936           | 1.186352 |
| 8         | Han         | T2(14)-1    | 1.032        | 0.861       | 0.668           | 1.198606 |

Peach- *Prunus persica* (*Amygdalus persica*)

| Grain no. | Length in mm | Width in mm | Thickness in mm |
|-----------|--------------|-------------|-----------------|
| 1         | 2.27         | 1.84        | 1.79            |
| 2         | 2.01         | 1.64        | 1.34            |
| 3         | 2.50         | 1.83        | 1.40            |
| 4         | 2.38         | 1.67        | 1.30            |
| 5         | 2.89         | 2.00        | 1.61            |
| 6         | 2.43         | 1.88        | 1.48            |
| 7         | 2.00         | 1.53        | 1.28            |
| 8         | 1.89         | 1.52        | 1.33            |
| 9         | 2.51         | 1.79        | 1.17            |
| 10        | 1.84         | 1.64        | 1.36            |
| 11        | 2.46         | 1.75        | 1.40            |
| 12        | 1.99         | 1.58        | 1.41            |
| 13        | 2.26         | 1.60        | 1.38            |
| 14        | 2.16         | 1.65        | 1.32            |
| 15        | 1.95         | 1.56        | 1.18            |
| 16        | 2.28         | 1.70        | 1.43            |
| 17        | 1.95         | 1.49        | 1.23            |
| 18        | 2.04         | 1.47        | 1.22            |
| 19        | 2.02         | 1.58        | 1.26            |
| 20        | 2.51         | 1.89        | 1.47            |
| 21        | 2.09         | 1.50        | 1.07            |
| 22        | 2.18         | 1.78        | 1.53            |
| 23        | 2.37         | 1.80        | 1.45            |
| 24        | 1.80         | 1.54        | 1.27            |
| 25        | 1.89         | 1.55        | 1.30            |
| 26        | 1.92         | 1.58        | 1.18            |
| 27        | 1.83         | 1.37        | 1.13            |
| 28        | 2.01         | 1.61        | 1.26            |
| 29        | 2.43         | 1.61        | 1.31            |
| 30        | 1.85         | 1.60        | 1.30            |
| 31        | 1.90         | 1.31        | 1.09            |
| 32        | 1.84         | 1.51        | 1.24            |
| 33        | 2.11         | 1.70        | 1.27            |
| 34        | 1.97         | 1.48        | 1.20            |
| 35        | 2.16         | 1.58        | 1.17            |
| 36        | 2.00         | 1.55        | 1.27            |
| 37        | 2.08         | 1.52        | 1.14            |
| 38        | 2.34         | 1.72        | 1.36            |
| 39        | 2.47         | 1.79        | 1.37            |
| 40        | 2.13         | 1.66        | 1.43            |
| 41        | 2.12         | 1.78        | 1.25            |
| 42        | 2.40         | 1.82        | 1.38            |
| 43        | 1.96         | 1.59        | 1.31            |

|           |      |      |      |
|-----------|------|------|------|
| <b>44</b> | 2.06 | 1.69 | 1.24 |
| <b>45</b> | 2.13 | 1.61 | 1.35 |
| <b>46</b> | 1.80 | 1.51 | 1.13 |
| <b>47</b> | 2.13 | 1.66 | 1.56 |
| <b>48</b> | 2.16 | 1.72 | 1.30 |
| <b>49</b> | 2.34 | 1.74 | 1.42 |
| <b>50</b> | 2.08 | 1.55 | 1.25 |
