# Supplementary material for: Food production and agricultural systems on the southwestern frontier of the Han Empire: archaeobotanical remains from the 2016 excavation of Hebosuo, Yunnan
Source: Archaeol Anthropol Sci. 2023 May 4;15(5):71. doi: 10.1007/s12520-023-01766-9 (PMC10160161; doi:10.1007/s12520-023-01766-9)
Supplement: Supplementary file 1 — Supplementary file1 (XLSX 40 KB) [file 12520_2023_1766_MOESM1_ESM.xlsx]

## Sheet: flotated samples
		Samples ID		T1③-1	H1-1	H1-2	H2-1	H2-2	T1⑦-1	T1⑦-2	T1⑧-1	T1⑨-1	T1⑨-2	T1⑩-1	T1⑩-2	T1⑪-1	T1⑪-2	T1⑫a-1	T1⑫a-2	T1⑫b-1	T1⑬-1	T1⑬-2	T1⑬-3	T1⑬-4	T1⑬-5	T1⑬-6	T1⑭-1	T1⑭-2	T1⑭-3	T1⑭-4	T1⑮-1	T1⑮-2	T1⑮-3	T1⑮-4	T1⑮-5	T1⑯-1	T1⑯-2	T1⑯-3	T1⑯-4	T1⑯-5	T1⑯-6	T1⑯-7	T1⑯-8	T1T2⑨:8-1	T2⑦-1	T2⑦-2	T2⑫a-1	T2⑫b-1	T2⑭-1
		Stratigraphic info			opening under layer 11 (T1)	opening under layer 11 (T1)	opening under layer 11 (T1)	opening under layer 11 (T1)
		Period		Ming Qing	Han	Han	Han	Han	Han	Han	Han	Han	Han	Han	Han	Han	Han	Han	Han	Han	Han	Han	Han	Han	Han	Han	Han	Han	Han	Han	Han	Han	Han	Han	Han	Han	Han	Han	Han	Han	Han	Han	Han	Han	Han	Han	Han	Han	Han
		sampling context		Cultural Layer	Filling	Filling	Filling	Filling	Cultural Layer	Cultural Layer	Cultural Layer	Cultural Layer	Cultural Layer	Cultural Layer	Cultural Layer	Cultural Layer	Cultural Layer	Cultural Layer	Cultural Layer	Cultural Layer	Cultural Layer	Cultural Layer	Cultural Layer	Cultural Layer	Cultural Layer	Cultural Layer	Cultural Layer	Cultural Layer	Cultural Layer	Cultural Layer	Cultural Layer	Cultural Layer	Cultural Layer	Cultural Layer	Cultural Layer	Cultural Layer	Cultural Layer	Cultural Layer	Cultural Layer	Cultural Layer	Cultural Layer	Cultural Layer	Cultural Layer	铜盒内下层土样	Cultural Layer	Cultural Layer	Cultural Layer	Cultural Layer	Cultural Layer
		Notes		-	悬钩子属未炭化；桃1个钻孔		悬钩子属，桃核，二姴委陵菜，马鞭草未炭化；桃核2个钻孔	桃，葫芦科，悬钩子属未炭化；桃1个钻孔									悬钩子属，盒子草，梅核，马鞭草，蛇莓未炭化；桃1个钻孔		桃核2钻孔	桃1个钻孔		盒子草，二姴委陵菜，悬钩子属，蛇莓，马鞭草未炭化；桃核6个钻孔	桃核1钻孔	桃1个钻孔	二姴委陵菜，马鞭草，蛇莓，地肤，悬钩子属均未炭化			桃核1钻孔	桃2个钻孔	桃3个钻孔	悬钩子属未炭化	桃核4个钻孔	桃核1钻孔	>1mm碳屑中含有大量未炭化木屑；桃核5个钻孔	桃2个钻孔		狗尾草带壳；2wheat for date	桃1个钻孔	悬钩子属未炭化	桃核1钻孔					眼子菜未炭化			-	桃核4个钻孔
		Volume L		7	10	8	11	10	8	12	12	9	7	6	8	10	9	8	10	12	9	37	10	15	12	15	8	11	10	12	12	11	13	8	15	10	10	15	11	12	10	10	7	10	10	10	10	12	10
		Sample vol g		0.4	405.2	89	291.8	363.9	1.1	50.8	18.6	6.3	19.4	21.8	42.3	69.3	229.1	11.2	206.3	306.6	27	187.7	287.7	108.7	28.6	84.5	18.6	286.9	95.1	112.5	103.5	133.6	65.4	249.8	186.2	117.7	46.2	59.2	90.5	26.7	79.4	29.1	56.8	8.3	25.8	2.9	11.9	2.5	65.8
CHARRED REMAINS		Charcoal weight >1mm		0.2	366.2	65.7	248.6	327.6	0.4	34.4	14.8	3.7	9.7	7.9	21.1	41.2	186.4	5	157.9	263.3	15.8	113.3	210.4	78.5	27.3	54.9	6.7	226.9	76.5	80.1	68	110.8	51	178.5	115.2	63.9	22.6	38.9	54	20.1	70.4	21.1	46.6	5.4	14	1.4	5.9	1.3	41.4
Family	Species	English name	Chinese name
	Cultivated crops
Poaceae	Grain parts	Poaceae rachises (cf. wheat/barley rachises)	麦穗轴					1														2												3				1
		Cerealia	谷物残块			2						1				2																			3												1
		Rice spikelet bases	稻基盘		824	385	794	592	7			7		11		1	1573	2	198	135	117	18724	256	5503	209	3465	16	2016	2106	904	756	2897	2597	5064	4012	657	358	1052	676	295	163	68	306	32	3	4	14		5327
	Triticum aestivum	wheat mature grains type I	小麦成熟长型				7	2						1				2				2	1	1				3	2																		1
		wheat immature grains type I	小麦未成熟长型																			1
		Compact wheat mature grains type II	小麦成熟圆形			1	6	8				1	2			2	3		3			4	3	1	3	4	2	6	7			2		8		1	4	1	2	2	16	3	1						3
		compact wheat immature grains type II	小麦未成熟圆形																																				1
	Oryza sativa	Rice mature whole grains	稻成熟完整			2		3				1		1			1							3	3	1		3	1			2						2			4		1	12					1
		Rice immature whole grains	稻未成熟完整																									1						1
		Rice mature grain fragments bigger than half grain	稻成熟残存>1/2				2										1	2	1					1	1		2	1	2		3							2			3			3			1
		Rice immature grain fragments bigger than half grain	稻未成熟残存>1/2																			12										1
		Rice mature rice fragments smaller than half grain	稻成熟残存<1/2				1											2		1				3			3	4	1												4		3	1					2
		Rice immature rice fragments smaller than half grain	稻未成熟残存<1/2									1										16
	Setaria italica	Foxtail millet mature grains >1mm	粟成熟＞1mm				2	2														3		2									2					1
		Foxtail millet mature grains <1mm	粟成熟＜1mm																																														1
		Foxtail millet immature grains <1mm	粟未成熟＜1mm
	Cultivated legumes
Fabaceae	Glycine max	Soybean	大豆													1									2
Fabaceae	Vigna cf angularis	Adzuki bean	赤豆													2
	Possible cultivated species		可能的栽培品种
Polygonaceae	Fagopyrum cf esculentum		荞麦																						2
Chenopodiaceae	Chenopodium album L.	Fat hen	藜		2	1	5	1	1								8		1		1	84	17	15	28	3		9	5	7	21	8			10	9	12	14	19	46	32	23	20			2			5
Chenopodiaceae	Chenopodium ficifolium Smith		小藜				12	12			3				16		13			2	15	307	12	64	322	26		27	9	84	266	35	5		258	75	24	31	245	3	238	88	52			1			13
	Fruits, Nuts and Tubers		水果，坚果及块茎
Vitaceae	Vitis L.	Grape	葡萄属																							1
Rosaceae	Duchesnea indica (Andr.) Focke		蛇莓														1			2		4			1									2
Rosaceae	Crataegus cuneata Sieb. et Zucc.	Hawthorn	野山楂										1										1		1			1
	Other possible economic species		其他可能的经济作物
Rutaceae	Zanthoxylum bungeanum Maxim.	Sichuan pepper	花椒																			2	1		1				1					1			1
		Indet fruits or nuts	不可鉴定的果实和果核		2																	2							1																				1
		Tuber fragments	块茎													1			1
	Seeds of field weeds		杂草
	Seeds of dryland field weeds		旱地杂草
Polygonaceae	Polygonum lapathifolium L.		酸模叶蓼																			5			4					1	4				1	4		5	3		4	2	3		1
Polygonaceae	Polygonum lapathifolium var. salicifolium Sibth.		绵毛酸模叶蓼																			3		2	4			1		2								1	1						2
Poaceae	Digitaria sanguinalis (L.) Scop.		马唐															1																															1
Poaceae	Setaria viridis (L.) Beauv.		狗尾草														1		1			1															1
Lamiaceae	Elsholtzia ciliata (Thunb.) Hyland.		香薷
Chenopodiaceae	Kochia scoparia (L.) Schrad.		地肤																						9
Caryophyllaceae	Stellaria media (L.) Villars		繁缕																													2										1				1
Brassicaceae	Rorippa globosa (Turcz.) Hayek		风花菜
Poaceae	Panicoideae A. Br.		黍亚科		2
	Seeds of wetland field weeds		湿地杂草
Polygonaceae	Polygonum amphibium L.		两栖蓼				2										1							1				1				1
Polygonaceae	Polygonum hydropiper L.		水蓼														1
Cyperaceae	Schoenoplectus juncoides (Roxburgh) Palla		萤蔺		1		4	4		2							2				3	7	2	2	5	3		9	1	6		1	1		6	1	5	2	1		1
Cyperaceae	Scirpus triqueter L.		藨草		3	1	7	11		1							3			1		12	3	8	9	3		8		1		4	3		3						2				2				7
Cyperaceae	Pycreus flavidus (Retzius) T. Koyama		球穗扁莎																							1					1																		1
Cyperaceae	Cyperus iria L.		碎米莎草
Cyperaceae	Eleocharis R. Br.		荸荠属														1				1	2	1	1	23	1				1		1	3		3			1			1		1
Cyperaceae	Bulbostylis Kunth		球柱草属		1	1																		1									1					1			1
	Seeds of wasteland weeds		荒地杂草
Polygonaceae	Polygonum capitatum Buch.-Ham. ex D. Don Prodr		头花蓼																																						2
Polygonaceae	Rumex hastatus D. Don		戟叶酸模																															1
Polygonaceae	Rumex nepalensis Spreng.		尼泊尔酸模
Fabaceae	Vicia sepium L.		野豌豆																						1
Fabaceae	Thermopsis lanceolata R. Br.		披针叶野决明					1																	4						1										1
Poaceae	Paspalum scrobiculatum var. orbiculare (G. Forster) Hackel		圆果雀稗																																		1
Poaceae	Lophatherum gracile		淡竹叶
Lamiaceae	Clinopodium chinense (Benth.) O. Ktze.		风轮菜																					1
Lamiaceae	Perilla frutescens (L.) Britt.		紫苏																						1
Lamiaceae	Stachys sieboldii Miquel		甘露子				1													1
Chenopodiaceae	Atriplex patens (Litv.) Iljin		滨藜												1							4	2		28			1		4	3	1			1	2	1	2	5	1	5		4
Asteraceae	Sigesbeckia orientalis L.		豨莶																						4																1
Oxalidaceae	Oxalis corniculata L.		酢浆草														1													5	2				13			1	1		4	1	1
Verbenaceae	Verbena officinalis L.		马鞭草				1															7							2					8
Malvaceae	Malvastrum coromandelianum (L.) Gurcke		赛葵																							1
Solanaceae	Nicandra physalodes (L.) Gaertner		假酸浆																																			1
	Other weedy remains		其他杂草
Cyperaceae	Cyperaceae		莎草科				1
Nymphaeaceae	Nymphaeaceae		睡莲科														1
Violaceae	Violaceae		堇菜科																												1
	Unidentified remains
		indet1	未知1																			2
		indet2	未知2				1	1			2						1					3				1									2			3	1		3
		indet3	未知3																																			1		2	14	1	1
		indet4	未知4
		indet5	未知5																						1																1								1
		indet6	未知6																				1
		indet7	未知7																1															1
		indet8	未知8				1	1
		indet9	未知9
		indet10	未知10																																						1
	Unidentifiable remains		不可鉴定													1									1			1
WATERLOGGED REMAINS			浸水遗存
	Fruits		水果
Cucurbitaceae	Lagenaria Ser.	possible bottle gourd	葫芦属					1																		1						1		2	1
Rosaceae	Prunus persica L.	Peach	桃		4		7	3									6		10	3	3	15	6	5	1			5	4	4		8	5	13	7			2		1									7
Rosaceae	Cerasus Mill.	possible cherry	樱属
Rosaceae	Prunus mume Sieb.	Japanese plum	梅														1											2
Rosaceae	Prunus L.		李属																		2									1
Rosaceae	Rubus L.		悬钩子属		12		99	180									28			37		4			8					1	3			7					1
	Seeds of field weeds
	Seeds of dryland field weeds		旱地杂草
Cucurbitaceae	Actinostemma tenerum Griff.		盒子草														1					1								1		1		1	1
	Seeds of wetland field weeds		湿地杂草
Apiaceae	Oenanthe benghalensis Benth. et Hook. f.		短辐水芹																					1
Potamogetonaceae	Potamogeton L.		眼子菜属																									1						1											8
	Seeds of wasteland weeds		荒地杂草
Cucurbitaceae	Zehneria indica (Lour.)Keraudren		马㼎儿																											1
Viburnaceae	Sambucus javanica Blume		接骨草									6			3						1
Rosaceae	Potentilla bifurca L.		二裂委陵菜				2															5			36									12
	Arboreal crops		木本植物
Ulmaceae	Celtis L.		朴属																										1					1
[truncated: 11 more columns]

## Sheet: hand-picked samples
		Samples ID final		T1⑬采-1	T1⑭采-1	T1⑭采-2	T1⑯采-1
		Stratigraphic info
		period		Han	Han	Han	Han
		sampling context		Cultural Layer	Cultural Layer	Cultural Layer	Cultural Layer
		notes
		volume L
		sample vol g
CHARRED REMAINS		charcoal weight >1mm
Family	Species	English name	Chinese name
	Cultivated crops
Poaceae	Triticum aestivum	Wheat mature grains type I	小麦			1
	Fruits
Vitaceae	Vitis L.		葡萄属			1
Rosaceae	Crataegus cuneata Sieb. et Zucc.		山楂属	1
	Tubers
		indet					1
	Seeds of field weeds
	Seeds of dryland field weeds
Polygonaceae	Polygonum lapathifolium var. salicifolium Sibth.		绵毛酸模叶蓼			2
	Seeds of wasteland weeds
Fabaceae	Thermopsis lanceolata R. Br.			1
	Unidentiefied remains
		indet3		2			30
		indet4		1
WATERLOGGED REMAINS
	Fruits
Cucurbitaceae	Lagenaria Ser.		葫芦属	42		30	3
Rosaceae	Prunus persica L.		桃		160
Rosaceae	Prunus mume Sieb.		梅		5		1
Rosaceae	Prunus L.		李属	1	2
Rosaceae	Cerasus Mill.		樱属		1
	Seeds of field weeds
	Seeds of dryland cultivation
Asteraceae	Xanthium strumarium L.		苍耳			4	2
	Seeds of wetland field weeds
Apiaceae	Oenanthe benghalensis Benth. et Hook. f.		短辐水芹	1		1
	Seeds of wasteland weeds
Cucurbitaceae	Zehneria indica (Lour.)Keraudren		马㼎儿	4		2
	Other weedy remains
Asteraceae	Asteraceae					1
	Arboreal crops
Anacardiaceae	Choerospondias axillaris (Roxb.) B. L. Burtt & A. W. Hill		南酸枣		1
Pinaceae	Pinus L.		松属				2
				53	169	42	39	303
